# Supplementary material for: Competitive Dynamics in the Political Marketplace: How Donor Firms’ Political Wins Prompt Product-Market Peers to Appoint Politicians to Their Boards
Source: Atypon-hosted journal article supplement (doi:10.1287/mnsc.2023.02952), 2025-08-20
Supplement: mnsc.2023.02952.sm1.pdf [file mnsc.2023.02952.sm1.pdf]

**Online Appendix (OA) for**  
**“Competitive Dynamics in the Political Marketplace: How Donor Firms’ Political Wins**  
**Prompt Product-Market Peers to Appoint Politicians to Their Boards”**

Zhiyan Wu  
School of Management  
Zhejiang University  
[zhiyan.z.wu@gmail.com](mailto:zhiyan.z.wu@gmail.com)

Wenjiao Cao  
Erasmus School of Economics  
Erasmus University  
[cao@ese.eur.nl](mailto:cao@ese.eur.nl)

**Online Appendix 1. Placebo Tests**

| Dependent variable =              | <i>Number of<br/>Non-Politicians Appointed</i> |                      | <i>Number of<br/>Politicians Appointed</i> |                    |
|-----------------------------------|------------------------------------------------|----------------------|--------------------------------------------|--------------------|
|                                   | (1)                                            | (2)                  | (3)                                        | (4)                |
| <i>Treatment Peers</i>            | 0.005<br>(0.060)                               | 0.006<br>(0.056)     | 0.038<br>(0.048)                           | 0.031<br>(0.049)   |
| <i>Annual Board Turnover</i>      |                                                | 0.620***<br>(0.076)  |                                            | 0.082**<br>(0.028) |
| <i>Log(Employees)</i>             |                                                | 0.269***<br>(0.024)  |                                            | 0.010<br>(0.015)   |
| <i>Leverage</i>                   |                                                | -0.264***<br>(0.049) |                                            | 0.189<br>(0.123)   |
| <i>Profitability</i>              |                                                | -0.001<br>(0.010)    |                                            | 0.035<br>(0.031)   |
| <i>Industry Competition (HHI)</i> |                                                | -0.573<br>(0.449)    |                                            | 0.384<br>(0.360)   |
| Constant                          | 0.926***<br>(0.041)                            | 0.429***<br>(0.065)  | 0.071*<br>(0.028)                          | -0.120+<br>(0.072) |
| Election F.E.                     | Yes                                            | Yes                  | Yes                                        | Yes                |
| Industry F.E.                     | Yes                                            | Yes                  | Yes                                        | Yes                |
| Observations                      | 14,273                                         | 14,273               | 538                                        | 538                |
| Adj-R-squared                     | 0.032                                          | 0.130                | 0.009                                      | 0.042              |

Robust standard errors in parentheses

+ p<0.1, \* p<0.05, \*\* p<0.01, \*\*\* p<0.001

**Online Appendix 2. Robustness Tests: Alternative Model Specifications**

| Dependent variable =              | <i>Number of Politicians Appointed</i> |           |                             |           | <i>Probability of Hiring Politicians</i> |          |             |           |
|-----------------------------------|----------------------------------------|-----------|-----------------------------|-----------|------------------------------------------|----------|-------------|-----------|
|                                   | Poisson Model                          |           | Zero-inflated Poisson Model |           | OLS Model                                |          | Logit Model |           |
|                                   | (1)                                    | (2)       | (3)                         | (4)       | (5)                                      | (6)      | (7)         | (8)       |
| <i>Treatment Peers</i>            | 0.611*                                 | 0.633*    | 0.577*                      | 0.571*    | 0.012*                                   | 0.012*   | 0.588*      | 0.614*    |
|                                   | (0.270)                                | (0.273)   | (0.254)                     | (0.261)   | (0.006)                                  | (0.006)  | (0.285)     | (0.291)   |
| <i>Annual Board Turnover</i>      |                                        | 0.557***  |                             | 0.551***  |                                          | 0.024*** |             | 0.586***  |
|                                   |                                        | (0.100)   |                             | (0.105)   |                                          | (0.005)  |             | (0.099)   |
| <i>Log(Employees)</i>             |                                        | 0.225***  |                             | 0.251***  |                                          | 0.009*** |             | 0.213***  |
|                                   |                                        | (0.057)   |                             | (0.065)   |                                          | (0.002)  |             | (0.056)   |
| <i>Leverage</i>                   |                                        | -0.265    |                             | -0.258    |                                          | -0.005   |             | -0.179    |
|                                   |                                        | (0.255)   |                             | (0.249)   |                                          | (0.005)  |             | (0.217)   |
| <i>Profitability</i>              |                                        | 0.041     |                             | 0.040     |                                          | 0.001    |             | 0.027     |
|                                   |                                        | (0.044)   |                             | (0.044)   |                                          | (0.001)  |             | (0.046)   |
| <i>Industry Competition (HHI)</i> |                                        | 0.094     |                             | -0.011    |                                          | -0.012   |             | -0.604    |
|                                   |                                        | (2.547)   |                             | (2.592)   |                                          | (0.068)  |             | (2.492)   |
| Constant                          | -20.845                                | -22.345   | 1.091***                    | 0.202     | 0.024***                                 | 0.005    | -5.037***   | -5.314*** |
|                                   | (.)                                    | (232.516) | (0.308)                     | (0.495)   | (0.004)                                  | (0.006)  | (1.183)     | (1.286)   |
| Election F.E.                     | Yes                                    | Yes       | Yes                         | Yes       | Yes                                      | Yes      | Yes         | Yes       |
| Industry F.E.                     | Yes                                    | Yes       | Yes                         | Yes       | Yes                                      | Yes      | Yes         | Yes       |
| Observations                      | 14,273                                 | 14,273    | 14,273                      | 14,273    | 14,273                                   | 14,273   | 13,509      | 13,509    |
| Pseudo-R-squared                  | 0.048                                  | 0.082     |                             |           |                                          |          | 0.035       | 0.066     |
| Log Likelihood                    |                                        |           | -2021.224                   | -1963.146 |                                          |          |             |           |
| Adj-R-squared                     |                                        |           |                             |           | 0.006                                    | 0.016    |             |           |

Robust standard errors in parentheses

+ p<0.1, \* p<0.05, \*\* p<0.01, \*\*\* p<0.001

The absence of a standard error for the constant in Model 1 is likely attributable to issues with model convergence.

**Online Appendix 3. Robustness Tests: Alternative Samples**

| Dependent variable =              | <i>Number of Politicians Appointed</i> |                     |                                 |                     |
|-----------------------------------|----------------------------------------|---------------------|---------------------------------|---------------------|
|                                   | General Elections Sample               |                     | Sample with Hedging Donor Firms |                     |
|                                   | (1)                                    | (2)                 | (3)                             | (4)                 |
| <i>Treatment Peers</i>            | 0.000<br>(0.001)                       | 0.000<br>(0.001)    | 0.013*<br>(0.006)               | 0.013*<br>(0.006)   |
| <i>Annual Board Turnover</i>      |                                        | 0.033***<br>(0.004) |                                 | 0.028***<br>(0.005) |
| <i>Log(Employees)</i>             |                                        | 0.012***<br>(0.002) |                                 | 0.012***<br>(0.003) |
| <i>Leverage</i>                   |                                        | -0.009**<br>(0.004) |                                 | -0.008<br>(0.006)   |
| <i>Profitability</i>              |                                        | -0.000<br>(0.001)   |                                 | 0.001<br>(0.001)    |
| <i>Industry Competition (HHI)</i> |                                        | -0.007<br>(0.034)   |                                 | -0.014<br>(0.080)   |
| Constant                          | 0.026***<br>(0.002)                    | 0.002<br>(0.003)    | 0.023***<br>(0.004)             | 0.001<br>(0.007)    |
| Election F.E.                     | Yes                                    | Yes                 | Yes                             | Yes                 |
| Industry F.E.                     | Yes                                    | Yes                 | Yes                             | Yes                 |
| Observations                      | 601,450                                | 601,450             | 16,847                          | 16,847              |
| Adj-R-squared                     | 0.009                                  | 0.030               | 0.007                           | 0.020               |

Robust standard errors in parentheses

+ p<0.1, \* p<0.05, \*\* p<0.01, \*\*\* p<0.001

**Online Appendix 4. Alternative Explanation: Mimetic Isomorphism**

| Dependent variable =              | <i>Probability of PAC Creation</i> |                     |                    |
|-----------------------------------|------------------------------------|---------------------|--------------------|
|                                   | <i>(t+1)</i>                       | <i>(t+2)</i>        | <i>(t+3)</i>       |
|                                   | (1)                                | (2)                 | (3)                |
| <i>Treatment Peers</i>            | 0.496<br>(0.482)                   | 0.670<br>(0.486)    | 0.412<br>(0.514)   |
| <i>Annual Board Turnover</i>      | -0.043<br>(0.196)                  | 0.006<br>(0.210)    | -0.040<br>(0.247)  |
| <i>Log(Employees)</i>             | 0.372***<br>(0.076)                | 0.289***<br>(0.075) | 0.121<br>(0.083)   |
| <i>Leverage</i>                   | -0.577<br>(0.490)                  | -0.283<br>(0.343)   | -0.505<br>(0.459)  |
| <i>Profitability</i>              | 0.057<br>(0.055)                   | 0.041<br>(0.042)    | 0.039<br>(0.048)   |
| <i>Industry Competition (HHI)</i> | -3.535<br>(5.925)                  | -2.496<br>(4.494)   | 2.615<br>(3.576)   |
| Constant                          | -4.849***<br>(1.202)               | -2.464+<br>(1.314)  | -3.328*<br>(1.517) |
| Election F.E.                     | Yes                                | Yes                 | Yes                |
| Industry F.E.                     | Yes                                | Yes                 | Yes                |
| Observations                      | 8,556                              | 7,537               | 7,216              |
| Pseudo-R-squared                  | 0.109                              | 0.108               | 0.095              |

Robust standard errors in parentheses

+ p<0.1, \* p<0.05, \*\* p<0.01, \*\*\* p<0.001

**Online Appendix 5. Alternative Explanation: Governance Pressures**

| Dependent variable =                                    | <i>Number of Politicians Appointed</i> |          |          |          |
|---------------------------------------------------------|----------------------------------------|----------|----------|----------|
|                                                         | (1)                                    | (2)      | (3)      | (4)      |
| <i>Treatment Peers</i>                                  | 0.014*                                 | 0.011+   | 0.014*   | 0.011    |
|                                                         | (0.006)                                | (0.007)  | (0.006)  | (0.007)  |
| <i>Number of Common Analysts</i>                        | 0.001                                  | 0.000    |          |          |
|                                                         | (0.001)                                | (0.001)  |          |          |
| <i>Treatment Peers x Common Analysts</i>                |                                        | 0.001    |          |          |
|                                                         |                                        | (0.001)  |          |          |
| <i>Number of Common Institutional Investors</i>         |                                        |          | 0.000+   | 0.000    |
|                                                         |                                        |          | (0.000)  | (0.000)  |
| <i>Treatment Peers x Common Institutional Investors</i> |                                        |          |          | 0.000    |
|                                                         |                                        |          |          | (0.000)  |
| <i>Annual Board Turnover</i>                            | 0.027***                               | 0.027*** | 0.025*** | 0.025*** |
|                                                         | (0.006)                                | (0.006)  | (0.005)  | (0.005)  |
| <i>Log(Employees)</i>                                   | 0.009**                                | 0.009**  | 0.005    | 0.005    |
|                                                         | (0.003)                                | (0.003)  | (0.003)  | (0.003)  |
| <i>Leverage</i>                                         | -0.007                                 | -0.007   | -0.007   | -0.006   |
|                                                         | (0.006)                                | (0.006)  | (0.006)  | (0.006)  |
| <i>Profitability</i>                                    | 0.001                                  | 0.001    | 0.001    | 0.001    |
|                                                         | (0.002)                                | (0.002)  | (0.002)  | (0.002)  |
| <i>Industry Competition (HHI)</i>                       | 0.010                                  | 0.012    | 0.011    | 0.010    |
|                                                         | (0.084)                                | (0.085)  | (0.084)  | (0.084)  |
| Constant                                                | 0.001                                  | 0.003    | 0.001    | 0.003    |
|                                                         | (0.007)                                | (0.007)  | (0.007)  | (0.007)  |
| Election F.E.                                           | Yes                                    | Yes      | Yes      | Yes      |
| Industry F.E.                                           | Yes                                    | Yes      | Yes      | Yes      |
| Observations                                            | 14,273                                 | 14,273   | 14,273   | 14,273   |
| Adj-R-squared                                           | 0.018                                  | 0.018    | 0.020    | 0.020    |

Robust standard errors in parentheses

+ p<0.1, \* p<0.05, \*\* p<0.01, \*\*\* p<0.001
